# Supplementary material for: A low-dissipation, pumpless, gravity-induced flow battery
Source: Royal Society of Chemistry journal article supplement (doi:10.1039/c6ee00874g), 2016-01-01
Supplement: c6ee00874g1.pdf [file c6ee00874g1.pdf]

## **Electronic Supplementary Information**

### **A Low-Dissipation, Pumpless, Gravity Induced Flow Battery**

Xinwei Chen<sup>a, #</sup>, Brandon J. Hopkins<sup>b, #</sup>, Ahmed Helal<sup>b</sup>, Frank Y. Fan<sup>a</sup>, Kyle C. Smith<sup>a</sup>, Zheng Li<sup>a</sup>, Alexander H. Slocum<sup>b</sup>, Gareth H. McKinley<sup>b</sup>, W. Craig Carter<sup>a</sup>, Yet-Ming Chiang<sup>a, \*</sup>

<sup>(a)</sup> Department of Materials Science and Engineering and <sup>(b)</sup> Department of Mechanical Engineering, Massachusetts Institute of Technology, Cambridge, Massachusetts 02139, United States

**\*Corresponding author's e-mail: [ychiang@mit.edu](mailto:ychiang@mit.edu)**

## Yield Stress Fluid Modeling

Yield stress fluids can be modeled using simple generalized Newtonian fluids models<sup>1</sup>. Typical models include the Bingham plastic model where the stress is the sum of a yield stress and a linear plastic response and the Herschel-Bulkley model where the stress is the sum of a yield stress and a power law plastic response that can account for shear-thinning in the suspension.

The equation for the Bingham model is given by:

$$\tau < \tau_B, \dot{\gamma} = 0 \quad (S1)$$

$$\tau \geq \tau_B, \tau = \tau_B + \mu_p \dot{\gamma} \quad (S2)$$

The equation for the Herschel-Bulkley model is given by:

$$\tau < \tau_y, \dot{\gamma} = 0 \quad (S3)$$

$$\tau \geq \tau_y, \tau = \tau_y + K \dot{\gamma}^n \quad (S4)$$

For flow modeling, using the Bingham model makes for more tractable equations but if the material is shear-thinning, the Bingham model fit will tend to overestimate the yield stress. A compromise between simpler flow equations and good accuracy for fits can be made if we use a piecewise Bingham model over the range of shear rates of interest where we define a transition stress  $\tau_t$  above which we allow the yield stress and plastic viscosity to change while keeping the function piecewise continuous.

The equation for the piecewise Bingham model is given by

$$\tau < \tau_B, \dot{\gamma} = 0 \quad (S5)$$

$$\tau \geq \tau_B, \tau = \tau_B + \mu_p \dot{\gamma} \quad (S6)$$

$$\tau \geq \tau_t, \tau = \tau_B' + \mu_p' \dot{\gamma} \quad (S7)$$

For a shear-thinning material, the piecewise Bingham model will provide a more accurate fit than the Bingham model while keeping linear plastic terms for simpler flow equations. A kink at the transition stress is a consequence of this model as seen in Figure S3a.

### Multiple Gap Slip Correction for Parallel Plate Geometry

If the rheometric steady shear flow curves show gap-dependence then the flow curves are not material properties and this gap-dependence is a signature of wall slip in the system. This can be corrected for using the following procedure from Yoshimura & Prud'homme<sup>2</sup>: for a given shear stress  $\tau$ , the apparent shear rate  $\dot{\gamma}_a(\tau)$  can be kinematically decomposed by the following relation:

$$\dot{\gamma}_a(\tau) = \dot{\gamma}(\tau) + \frac{2V_s(\tau)}{H} \quad (S8)$$

where  $\dot{\gamma}(\tau)$  is the true shear rate experienced by the sample and  $V_s(\tau)$  is the slip velocity at each wall at the given stress. For each given stress, the apparent shear rate is plotted against  $1/H$  and a linear fit is applied to the curves. The intercept & the slope are used to extract the true shear rate and the slip velocity for the given stress respectively.

### Scaling of Mechanical Loss with GIFcell Size

Here we analyze the mechanical energy consumed in operating the GIFcell as a function of its size. The mechanical energy per unit mass to tilt the cell by an angle  $2\theta$  is given by:

$$e_{mechanical} = gL_{travel}\sin\theta \quad (S9)$$

where  $L_{travel}$  is the length of the electrolyte chamber or “tank” as illustrated in Fig. 2c and  $g$  is the gravitational force constant. As a starting point, consider that the mechanical energy for 25 flips of the prototype GIFcell is 0.032 J/g, which is in the order of  $\sim 10^{-4}$  of the electrochemical energy extracted for this system. The following table shows how the ratio of mechanical energy to electrochemical energy scales with tank length  $L_{tank}$ , assuming 25 tilt operations are needed to fully charge or discharge the cell.

**Table S1:** The effect of tank length  $L_{tank}$  on the ratio of mechanical energy to electrochemical energy, assuming 25 tilt operations are needed to fully charge or discharge the cell.

| <b><math>L_{tank}</math> (meters)</b>             | 0.07 (lab scale) | 0.1    | 1     | 10    | 100   |
|---------------------------------------------------|------------------|--------|-------|-------|-------|
| <b>Mechanical to electrochemical energy ratio</b> | 0.023%           | 0.032% | 0.32% | 3.26% | 32.6% |

It is seen that a GIFcell could in principle be several meters long while retaining high mechanical efficiency. The other adjustable parameters are the energy density of the suspension, which could increase by a factor of 2 or 3 while remaining within the sulfur solubility limit, and the number of tilts required, which could decrease; both would further decrease the mechanical losses from those shown.



## Supplementary Figures

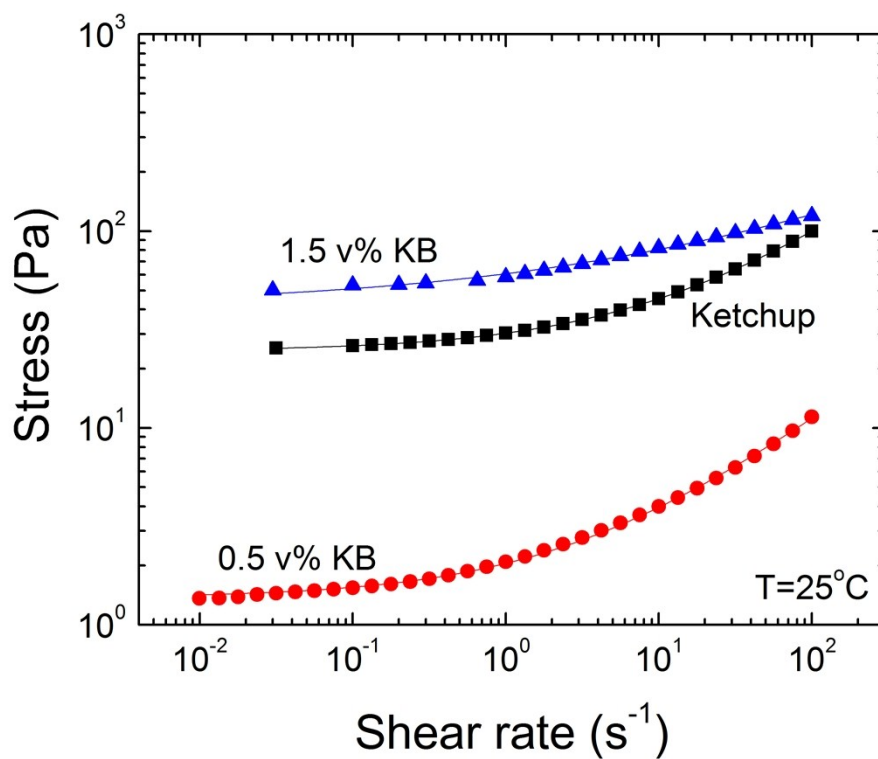

**Figure S1:** Comparing the slip-corrected flow curves measured at 25 °C of 0.5 vol% and 1.5 vol% KB of 2.5 M  $\text{Li}_2\text{S}_8$  triglyme suspension (0.5 M LiTFSI salt and 1 wt%  $\text{LiNO}_3$ ) with ketchup (Heinz 57®). All these fluids exhibit a yield stress and shear-thinning behavior.

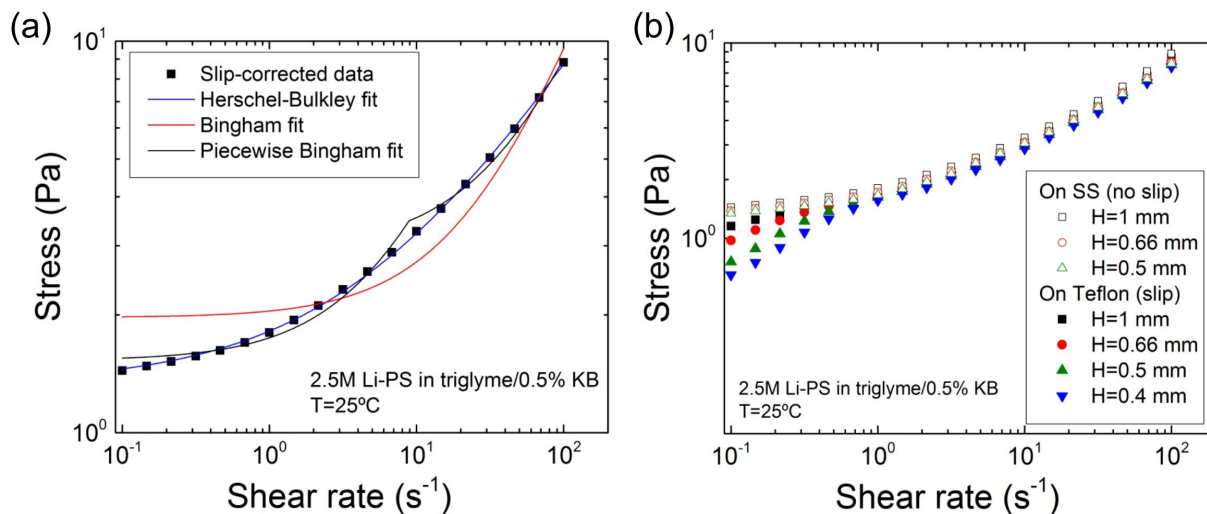

**Figure S2:** (a) Comparison of fits to different yield stress models to the slip-corrected flow curve data measured for a 2.5 M  $\text{Li}_2\text{S}_8$  suspension in triglyme with 0.5 vol% KB, 0.5 M LiTFSI and 1 wt%  $\text{LiNO}_3$  at  $T = 25^\circ\text{C}$ . (b) Flow curves for a triglyme-based suspension at  $T = 25^\circ\text{C}$  measured at different gaps ( $H = 1, 0.75, 0.5$  and  $0.4$  mm) on a stainless steel and Teflon<sup>®</sup>.

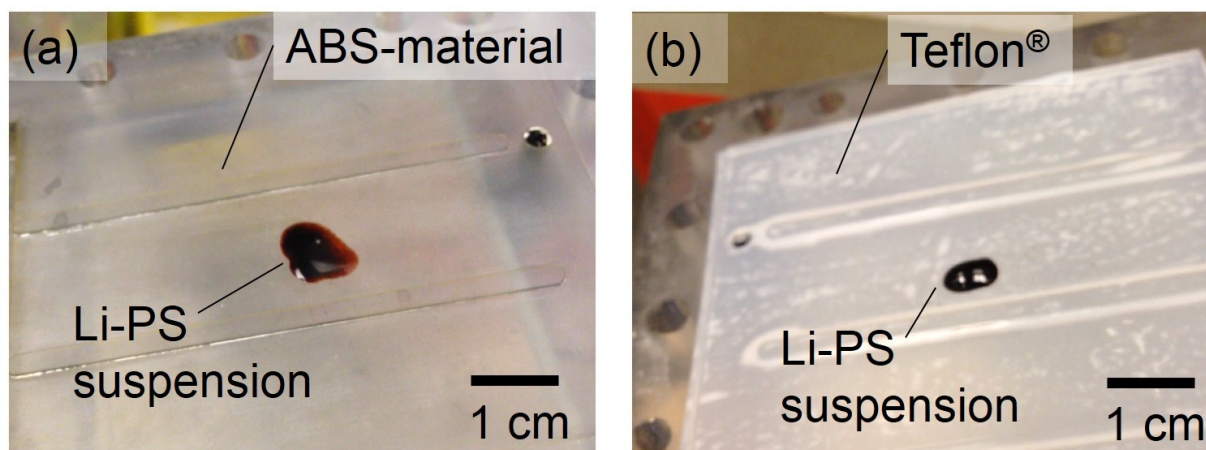

**Figure S3:** A snapshot of Movie S2 shows how the droplet of 2.5 M  $\text{Li}_2\text{S}_8$  suspension (0.5 vol% KB, 0.5 M LiTFSI and 1 wt%  $\text{LiNO}_3$ ) behaves on (a) ABS-material and (b) Teflon<sup>®</sup>. The droplet spreads and sticks on to the surface in the former, while the same droplet rolls freely without getting pinned to the surface.

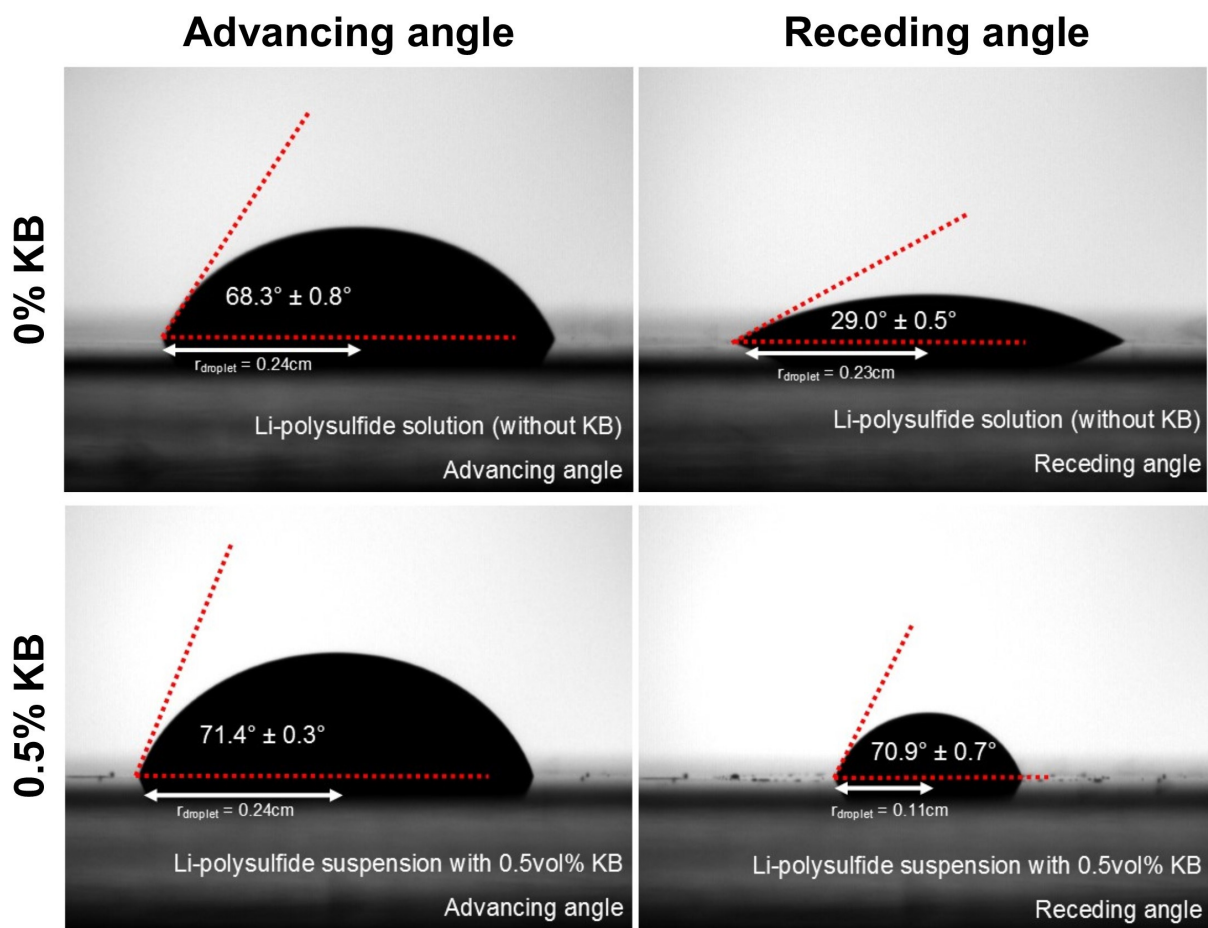

**Figure S4:** Comparing the advancing and receding contact angles of a 0 vol% and a 0.5 vol% KB, 2.5 M Li<sub>2</sub>S<sub>8</sub> suspension (0.5 M LiTFSI and 1 wt% LiNO<sub>3</sub> in triglyme) on a clean Teflon® surface. The experiment was carried out using a goniometer (Ramé-hart model 590).

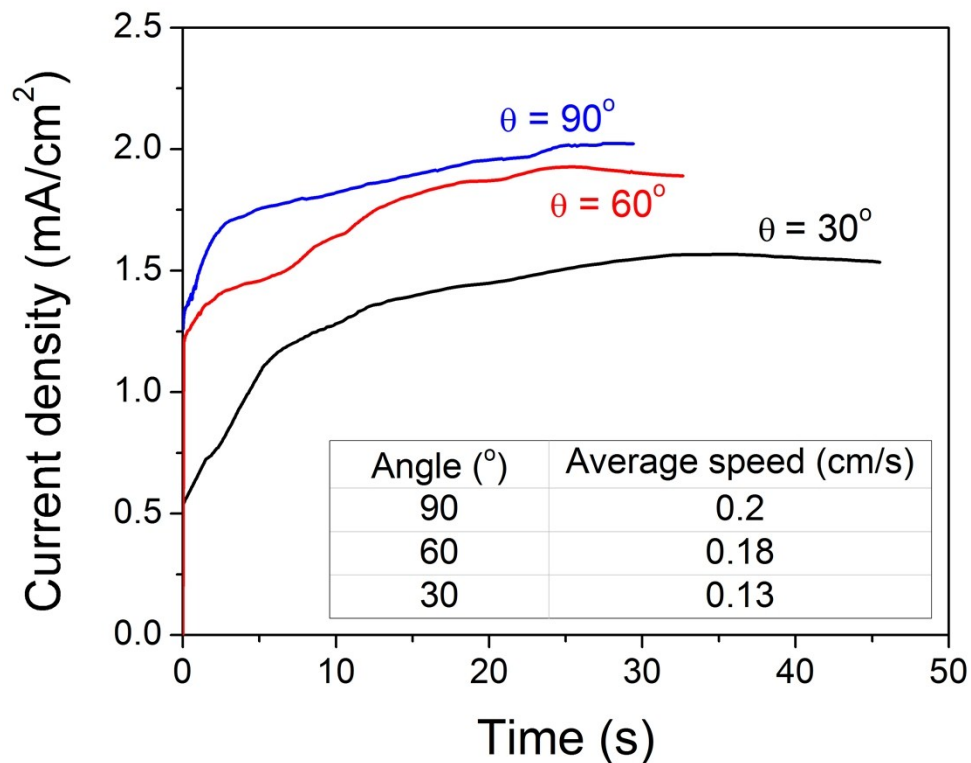

**Figure S5:** The current density extracted and the average speed of the catholyte show a dependence of the tilt angles ( $30^\circ$ ,  $60^\circ$  and  $90^\circ$ ) of the GIFcell during potentiostatic discharge at 2.00 V. The dimensions of the flow channel are:  $H = 1.6$  mm,  $L = 80$  mm,  $W = 13$  mm. The average speed of the suspension plug is calculated by dividing the length of flow ( $L_{tank}$ ) with flow time. Catholyte: 2.5 M  $\text{Li}_2\text{S}_8$  (with respect to the S) suspension with 0.5 vol% KB, 0.5 M LiTFSI, 1 wt%  $\text{LiNO}_3$  in tetraglyme. Anode: Lithium metal.

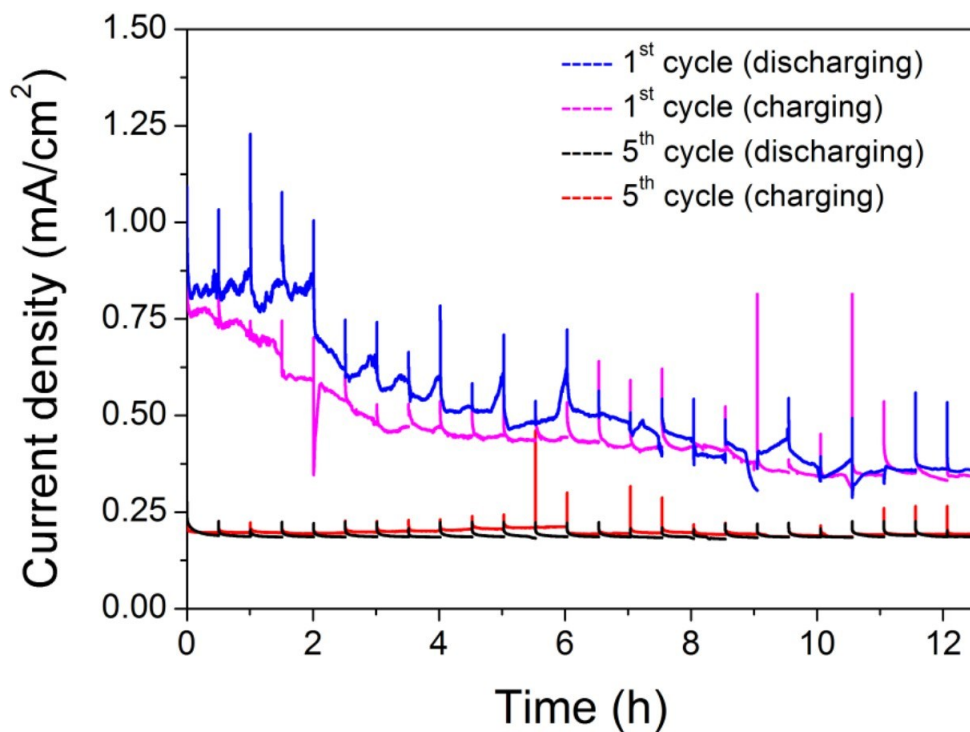

**Figure S6:** 1<sup>st</sup> and 5<sup>th</sup> cycle of GIFcell angled at 10° (with respect to the horizontal) during electrochemical testing using potentiostatic mode of operation (Discharging at 2.05 V and charging at 2.6 V). Catholyte: 2.5 M Li<sub>2</sub>S<sub>8</sub> (with respect to the S) suspension with 0.5 vol% KB, 0.5 M LiTFSI, 1 wt% LiNO<sub>3</sub> in triglyme. Anode: Lithium metal.

## References

1. H. A. Barnes, *J. Nonnewton. Fluid Mech.*, 1999, **81**, 133–178.
2. A. Yoshimura and R. K. Prud'homme, *J. Rheol.*, 1988, **32**, 53–67.
